# Supplementary material for: Predicting educational achievement from DNA
Source: Springer Nature journal article supplement (doi:10.1038/mp.2016.107), 2016-07-19
Supplement: mp2016107x1.pdf [file mp2016107x1.pdf]

# Supplementary material

## Title

Predicting Educational Achievement from DNA

## Authors

Saskia Selzam<sup>1</sup>, Eva Krapohl<sup>1</sup>, Sophie von Stumm<sup>2</sup>, Paul O'Reilly<sup>1</sup>, Kaili Rimfeld<sup>1</sup>, Yulia Kovas<sup>2,3</sup>, Philip S. Dale<sup>4</sup>, James J. Lee<sup>5</sup>, Robert Plomin<sup>\*1</sup>

## Supplementary Tables

**Table S1. Representativeness of genotyped TEDS sample**

|                                 | <i>N</i> | Female | A-levels:<br>parental | Mother<br>employed | Father<br>employed |
|---------------------------------|----------|--------|-----------------------|--------------------|--------------------|
| UK census<br>2001               | N/A      | 50%    | 32%                   | 49%                | 89%                |
| TEDS 1 <sup>st</sup><br>contact | 5,825    | 53%    | 33%                   | 46%                | 93%                |

*Note.* We used the 2001 UK census data (ONS, 2001; <https://www.ons.gov.uk/census/2001censusandearlier/aboutcensus2001>) for families with children rather than 2011 UK census data for TEDS twins as they were born between 1994-96.

**Table S2. Descriptive Statistics**

|                | <i>N</i> | Mean | SE   | Mean F | SE F | Mean M | SE M | skew  | min   | max  | $R^2$ | $R^{2'}$ |
|----------------|----------|------|------|--------|------|--------|------|-------|-------|------|-------|----------|
| EA 7*          | 4047     | 0.05 | 0.02 | 0.08   | 0.02 | 0.01   | 0.02 | -0.49 | -3.96 | 2.88 | <.01  | 0.02     |
| EA 12*         | 2950     | 0.03 | 0.02 | 0.07   | 0.02 | -0.02  | 0.03 | 0.4   | -3.52 | 4.85 | <.01  | 0.09     |
| EA 16          | 4301     | 8.92 | 0.02 | 9.01   | 0.03 | 8.84   | 0.03 | -0.49 | 4     | 11   | <.01  | <.01     |
| SES*           | 4958     | 0.12 | 0.01 | 0.14   | 0.02 | 0.18   | 0.02 | 0.07  | -2.6  | 2.58 | N/A   | N/A      |
| <i>g</i> comp* | 2228     | 0.11 | 0.02 | 0.15   | 0.03 | 0.09   | 0.02 | -0.07 | -2.71 | 2.55 | nil   | nil      |
| <i>g</i> 7*    | 3559     | 0.04 | 0.02 | 0.05   | 0.02 | 0.03   | 0.03 | -0.1  | -4    | 5    | nil   | <.01     |
| <i>g</i> 12*   | 3349     | 0.04 | 0.02 | -0.04  | 0.02 | 0.13   | 0.03 | -0.31 | -3    | 3    | <.01  | 0.05     |
| <i>g</i> 16*   | 1743     | 0    | 0.02 | -0.03  | 0.03 | 0.04   | 0.04 | 0.28  | -3    | 3    | <.01  | <.01     |

Note. *N* = number of participants;  $R^2$  = variance explained by gender differences;  $R^{2'}$  = variance explained by age; EA = educational achievement; SES = socioeconomic status; *g* comp = general cognitive ability composite based on *g* measures at age 7, 12 and 16; *g* 7 = general cognitive ability age 7; *g* 12 = general cognitive ability age 12; *g* 16 = general cognitive ability age 16; F = female; M = male; \*standardization was required to form composite.

**Table S3. Study cohorts included in the *EduYears* GWAS summary statistics**

| Study           | Full name                                              | Sampling                             | Country     | Sample size | Reference | Birth year (Mean/Range) | Fraction female |
|-----------------|--------------------------------------------------------|--------------------------------------|-------------|-------------|-----------|-------------------------|-----------------|
| ACPRC           | Manchester Studies of Cognitive Ageing                 | Population-based                     | England     | 1713        | 1         | 1923 (1903-1948)        | 0.71            |
| AGES            | Age, Gene/ Environment Susceptibility- Reykjavik Study | Population-based                     | Iceland     | 3212        | 2         | 1927 (1908-1936)        | 0.58            |
| ALSPAC          | Avon Longitudinal Study of Parents and Children        | Population-based birth cohort        | England     | 2877        | 3         | 1959 (1948-1963)        | 1.00            |
| ASPS            | Austrian Stroke Prevention Study                       | Population-based                     | Austria     | 777         | 4,5       | 1932 (1909-1949)        | 0.57            |
| BASE-II         | Berlin Aging Study II                                  | Population-based                     | Germany     | 1619        | 6         | 1948 (1925-1983)        | 0.52            |
| CoLaus          | Cohorte Lausannoise                                    | Population-based                     | Switzerland | 3269        | 7         | 1950 (1928-1970)        | 0.53            |
| COPSAC2000      | Copenhagen Studies on Asthma in Childhood 2000         | Case-control birth cohort            | Germany     | 318         | 8         | 1966 (1964-1969)        | 0.47            |
| CROATIA-Korčula | Croatia Korčula                                        | Population-based (Isolate)           | Croatia     | 842         | 9         | 1950 (1909-1977)        | 0.64            |
| deCODE          | deCODE genetics                                        | Population-based                     | Iceland     | 46758       | 10        | 1945 (1894-1983)        | 0.57            |
| DHS             | Dortmund Health Study                                  | Population-based                     | Germany     | 953         | 11        | 1949 (1929-1974)        | 0.53            |
| DIL             | Wellcome Trust Diabetes and Inflammation Laboratory    | Population-based                     | England     | 2578        | 12        | 1958 (1958-1958)        | 0.52            |
| EGCUT1          | Estonian Genome Center, University of Tartu            | Population-based                     | Estonia     | 5597        | 13        | 1950 (1905-1980)        | 0.55            |
| EGCUT2          | Same as above                                          | Population-based                     | Estonia     | 1328        | 13        | 1957 (1911-1979)        | 0.53            |
| EGCUT3          | Same as above                                          | Population-based                     | Estonia     | 2047        | 13        | 1966 (1930-1982)        | 0.73            |
| ERF             | Erasmus Rucphen Family Study                           | Family-based                         | Netherlands | 2433        | 14,15     | 1952 (1914-1974)        | 0.55            |
| FamHS           | Family Heart Study                                     | Family-based                         | USA         | 3483        | 16,17     | 1941 (1900-1965)        | 0.53            |
| FINRISK         | The National FINRISK Study                             | Case-control (Cardiovascular health) | Finland     | 1685        | 18        | 1946 (1923-1977)        | 0.46            |
| FTC             | Finnish Twin Cohort                                    | Family-based                         | Finland     | 2418        | 19        | 1945 (1910-1972)        | 0.56            |
| GOYA            | Genetics of Overweight Young Adults                    | Case-control (Obesity)               | Denmark     | 1459        | 20        | 1947 (1944-1954)        | 0.00            |
| GRAPHIC         | Genetic Regulation of Arterial Pressure in Humans      | Population-based                     | England     | 727         | 21        | 1951 (1942-1965)        | 0.53            |
| GS              | Generation Scotland                                    | Population-based                     | Scotland    | 8776        | 22        | 1955 (1909-1981)        | 0.59            |
| H2000 Cases     | Health 2000                                            | Case-control (Metabolic syndrome)    | Finland     | 797         | 23        | 1949 (1924-1970)        | 0.50            |
| H2000 Controls  | Same as above                                          | Case-control (Metabolic syndrome)    | Finland     | 819         | 23        | 1949 (1924-1969)        | 0.52            |
| HBCS            | Helsinki Birth Cohort Study                            | Population-based birth cohort        | Finland     | 1617        | 24        | 1941 (1934-1944)        | 0.57            |
| HCS             | Hunter Community Study                                 | Population-based                     | Australia   | 1946        | 25        | 1940 (1920-1951)        | 0.49            |
| HNRS (CorexB)   | Heinz Nixdorf Recall Study                             | Population-based                     | Germany     | 1401        | 25        | 1942 (1926-1955)        | 0.50            |
| HNRS (Oexpr)    | Same as above                                          | Same as above                        | Germany     | 1347        | 25        | 1942 (1926-1955)        | 0.50            |
| HNRS (Omni1)    | Same as above                                          | Same as above                        | Germany     | 778         | 26        | 1942 (1927-1955)        | 0.52            |
| HRS             | Health and Retirement Study                            | Population-based                     | USA         | 9963        | 27        | 1940 (1900-1979)        | 0.42            |

|                   |                                                                    |                                               |                       |       |       |                     |      |
|-------------------|--------------------------------------------------------------------|-----------------------------------------------|-----------------------|-------|-------|---------------------|------|
| Hypergenes        | Hypergenes                                                         | Case-control                                  | Italy/ UK/<br>Belgium | 815   | 28    | 1945<br>(1914-1971) | 0.46 |
| INGI-CARL         | Italian Network of<br>Genetic Isolates -<br>Carlantino             | Population-<br>based (Isolate)                | Italy                 | 947   | 28    | 1946<br>(1910-1975) | 0.58 |
| INGI-FVG          | Italian Network of<br>Genetic Isolates -<br>Friuli Venezia Giulia  | Population-<br>based (Isolate)                | Italy                 | 943   | 29    | 1951<br>(1917-1978) | 0.60 |
| KORA S3           | Kooperative<br>Gesundheitsforschung<br>in der Region<br>Augsburg   | Population-<br>based                          | Germany               | 2655  | 29    | 1945<br>(1920-1964) | 0.51 |
| KORA S4           | Same as above                                                      | Population-<br>based                          | Germany               | 2721  | 30    | 1949<br>(1926-1970) | 0.51 |
| LBC1921           | Lothian Birth Cohort<br>1921                                       | Population-<br>based birth<br>cohort          | Scotland              | 515   | 31    | 1921<br>(1921-1921) | 0.58 |
| LBC1936           | Lothian Birth Cohort<br>1936                                       | Population-<br>based birth<br>cohort          | Scotland              | 1003  | 32    | 1936<br>(1936-1936) | 0.49 |
| LifeLines         | The LifeLines Cohort<br>Study                                      | Population-<br>based                          | Netherlands           | 12539 | 33    | 1960<br>(1921-1980) | 0.58 |
| MCTFR             | Minnesota Center for<br>Twin and Family<br>Research                | Family-based,<br>but only<br>founders used.   | USA                   | 3819  | 34    | 1953<br>(1926-1974) | 0.54 |
| MGS               | Molecular Genetics of<br>Schizophrenia                             | Population-<br>based                          | USA                   | 2313  | 35,36 | 1951<br>(1914-1976) | 0.50 |
| MoBa              | Mother and Child<br>Cohort of NIPH                                 | Population-<br>based (Nested<br>case-control) | Norway                | 622   | 37,38 | 1971<br>(1966-1976) | 1.00 |
| NBS               | Nijmegen Biomedical<br>Study                                       | Population-<br>based                          | Netherlands           | 1808  | 39    | 1941<br>(1923-1972) | 0.50 |
| NESDA             | Netherlands Study of<br>Depression and<br>Anxiety                  | Case-control<br>(Mental health)               | Netherlands           | 1820  | 40    | 1958<br>(1939-1977) | 0.64 |
| NFBC66            | Northern Finland Birth<br>Cohort 1966                              | Population-<br>based                          | Finland               | 5297  | 41,42 | 1966<br>(1966-1966) | 0.52 |
| NTR               | Netherlands Twin<br>Register                                       | Family-based                                  | Netherlands           | 5246  | 43    | 1958<br>(1917-1989) | 0.64 |
| OGP               | Oglastra Genetic<br>Park                                           | Population-<br>based                          | Italy                 | 370   | 44    | 1950<br>(1916-1976) | 0.00 |
| OGP-Talana        | Oglastra Genetic<br>Park-Talana                                    | Population-<br>based (Isolate)                | Italy                 | 544   | 44    | 1949<br>(1910-1977) | 0.59 |
| ORCADES           | Orkney Complex<br>Disease Study                                    | Population-<br>based (Isolate)                | Scotland              | 1828  | 45    | 1952<br>(1914-1979) | 0.60 |
| PREVEND           | Prevention of Renal<br>and Vascular End-<br>stage Disease          | Population-<br>based                          | Netherlands           | 3578  | 46    | 1948<br>(1923-1968) | 0.48 |
| QIMR              | Queensland Institute<br>of Medical Research                        | Family-based                                  | Australia             | 8006  | 47    | 1956<br>(1900-1984) | 0.59 |
| RS-I              | Rotterdam Study<br>Baseline                                        | Population-<br>based                          | Netherlands           | 6108  | 48,49 | 1922<br>(1893-1938) | 0.60 |
| RS-II             | Rotterdam Study<br>Extension of Baseline                           | Same as above                                 | Netherlands           | 1667  | 48,49 | 1935<br>(1906-1944) | 0.52 |
| RS-III            | Rotterdam Study<br>Young                                           | Same as above                                 | Netherlands           | 3040  | 48,49 | 1950<br>(1910-1960) | 0.56 |
| Rush-MAP          | Rush University<br>Medical Center -<br>Memory and Aging<br>Project | Community-<br>based                           | USA                   | 887   | 50    | 1921<br>(1901-1948) | 0.72 |
| Rush-ROS          | Rush University<br>Medical Center -<br>Religious Orders<br>Study   | Community-<br>based                           | USA                   | 808   | 51    | 1921<br>(1896-1946) | 0.66 |
| SardiNIA          | SardiNIA Study of<br>Aging                                         | Family-based                                  | Italy                 | 5616  | 52    | 1955<br>(1901-1983) | 0.58 |
| SHIP              | Study of Health in<br>Pomerania                                    | Population-<br>based                          | Germany               | 3556  | 52    | 1945<br>(1918-1971) | 0.50 |
| SHIP-TREND        | Study of Health in<br>Pomerania                                    | Population-<br>based                          | Germany               | 901   | 53    | 1956<br>(1928-1980) | 0.57 |
| STR – Salty       | Swedish Twin<br>Registry                                           | Family-based                                  | Sweden                | 4832  | 52    | 1951<br>(1943-1958) | 0.52 |
| STR –<br>Twingene | Swedish Twin<br>Registry                                           | Family-based                                  | Sweden                | 9553  | 54    | 1941<br>(1916-1958) | 0.53 |
| THISEAS           | The Hellenic Study of<br>Interactions between                      | Case-control                                  | Greece                | 829   | 55    | 1950<br>(1909-1979) | 0.33 |

|          |                                                       |                      |         |        |          |                     |      |
|----------|-------------------------------------------------------|----------------------|---------|--------|----------|---------------------|------|
|          | SNPs & Eating in<br>Atherosclerosis<br>Susceptibility |                      |         |        |          |                     |      |
| TwinsUK  | St Thomas' UK Adult<br>Twin Registry                  | Population-<br>based | England | 4012   | 56       | 1949<br>(1919-1978) | 1.00 |
| WTCCC58C | 1958 British Birth<br>Cohort                          | Population-<br>based | England | 2804   | 57       | 1958<br>(1958-1958) | 0.48 |
| YFS      | The Cardiovascular<br>Risk in Young Finns<br>Study    | Population-<br>based | Finland | 2029   |          | 1969<br>(1962-1977) | 0.55 |
| UKB      | UK Biobank                                            | Population-<br>based | UK      | 111349 | 58<br>59 | 1951<br>(1934-1970) | 0.53 |

---

Note. Adapted from Okbay et al., *Nature*, in press<sup>60</sup>

**Table S4. Numbers of SNPs per threshold used in creating *EduYears* GPS**

| pT                   | Number of SNPs |
|----------------------|----------------|
| 0.001                | 2,162          |
| 0.01                 | 7,303          |
| 0.05                 | 19,415         |
| 0.055 <sup>1</sup>   | 20,582         |
| 0.063 <sup>2,3</sup> | 22,384         |
| 0.067 <sup>4,5</sup> | 23,316         |
| 0.072 <sup>6</sup>   | 24,377         |
| 0.1                  | 30,086         |
| 0.2                  | 46,636         |
| 0.3                  | 60,012         |
| 0.362 <sup>7</sup>   | 67,265         |
| 0.364 <sup>8</sup>   | 67,470         |
| 0.4                  | 71,382         |
| 0.5                  | 81,149         |

Note. pT = *P*-value threshold; <sup>1</sup>'Best-fit' GPS for *g* 16; <sup>2</sup>'Best-fit' GPS for *g* 7; <sup>3</sup>'Best-fit' GPS for *g* composite; <sup>4</sup>'Best-fit' GPS for *g* 12; <sup>5</sup>'Best-fit' GPS for EA 16; <sup>6</sup>'Best-fit' GPS for family SES; <sup>7</sup>'Best-fit' GPS for EA 12; <sup>8</sup>'Best-fit' GPS for EA 7.

**Table S5. Testing significance of differences of the correlations between *EduYears* GPS and educational achievement at ages 7, 12 and 16.**

|                                       | <i>z</i> | <i>P</i> -value |
|---------------------------------------|----------|-----------------|
| <i>r</i> GPS-EA7 - <i>r</i> GPS-EA12  | 1.65     | 0.10            |
| <i>r</i> GPS-EA12 - <i>r</i> GPS-EA16 | 3.88     | < 0.001         |
| <i>r</i> GPS-EA7 - <i>r</i> GPS-EA16  | 6.29     | < 0.001         |

Note. GPS = *EduYears* GPS; EA 7 = educational achievement age 7; EA 12 = educational achievement age 12; EA 16 = educational achievement age 16; *r* = Pearson's correlation.

**Table S6. Correlations among all variables**

|             | EA 7    | EA 12   | EA 16   | <i>g</i> comp | <i>g</i> 7 | <i>g</i> 12 | <i>g</i> 16 | SES     | GPS |
|-------------|---------|---------|---------|---------------|------------|-------------|-------------|---------|-----|
| EA7         | 1       |         |         |               |            |             |             |         |     |
| EA12        | 0.60*** | 1       |         |               |            |             |             |         |     |
| EA16        | 0.59*** | 0.66*** | 1       |               |            |             |             |         |     |
| <i>g</i>    | 0.50*** | 0.53*** | 0.61*** | 1             |            |             |             |         |     |
| <i>g</i> 7  | 0.45*** | 0.41*** | 0.46*** | 0.76***       | 1          |             |             |         |     |
| <i>g</i> 12 | 0.44*** | 0.48*** | 0.53*** | 0.83***       | 0.45***    | 1           |             |         |     |
| <i>g</i> 16 | 0.41*** | 0.48*** | 0.58*** | 0.83***       | 0.42***    | 0.59***     | 1           |         |     |
| SES         | 0.33*** | 0.35*** | 0.46*** | 0.37***       | 0.33***    | 0.34***     | 0.33***     | 1       |     |
| GPS         | 0.17*** | 0.21*** | 0.30*** | 0.19***       | 0.15***    | 0.19***     | 0.20***     | 0.27*** | 1   |

Note. EA 7 = educational achievement age 7; EA 12 = educational achievement age 12; EA 16 = educational achievement age 16; *g* comp = general cognitive ability composite; *g* 7 = general cognitive ability age 7; *g* 12 = general cognitive ability age 12; *g* 16 = general cognitive ability age 16; SES = family socioeconomic status; GPS = genome-wide polygenic score; \*\*\*P < 0.001; \*unique 'best-fit' GPS was used for each respective trait, see methods section for details.



**Table S7. Predicting educational achievement at age 7, 12 and 16 from *g*, SES and EduYears GPS: Multiple Regression Analysis**

| <i>Dependent variable:</i>     |                                            |                                            |                                            |
|--------------------------------|--------------------------------------------|--------------------------------------------|--------------------------------------------|
|                                | EA 7                                       | EA 12                                      | EA 16                                      |
| <i>g</i>                       | <b>0.44<sup>***</sup></b><br>(0.40 - 0.48) | <b>0.46<sup>***</sup></b><br>(0.38 - 0.48) | <b>0.50<sup>***</sup></b><br>(0.45 - 0.52) |
| SES                            | <b>0.14<sup>***</sup></b><br>(0.09 - 0.19) | <b>0.17<sup>**</sup></b><br>(0.11 - 0.22)  | <b>0.25<sup>**</sup></b><br>(0.22 - 0.30)  |
| GPS                            | 0.03<br>(-0.01 - 0.07)                     | 0.07 <sup>*</sup><br>(-0.01 - 0.11)        | <b>0.11<sup>***</sup></b><br>(0.07 - 0.14) |
| <i>N</i>                       | 1,738                                      | 1,035                                      | 1,763                                      |
| <i>R</i> <sup>2</sup>          | 0.27                                       | 0.32                                       | 0.45                                       |
| Adjusted <i>R</i> <sup>2</sup> | 0.27                                       | 0.31                                       | 0.45                                       |
| Residual Std. Error            | 0.85 (df = 1,734)                          | 0.80 (df = 1,031)                          | 0.72 (df = 1,759)                          |
| <i>F</i> Statistic             | 212.50 <sup>***</sup> (df = 3; 1,734)      | 158.81 <sup>***</sup> (df = 3; 1,031)      | 474.64 <sup>***</sup> (df = 3; 1,759)      |

Note. Standardized coefficients are presented; 95% Confidence Intervals in brackets; \**P* < 0.05; \*\**P* < 0.01; \*\*\**P* < 0.001; unique 'best-fit' GPS was used for each respective trait.

**Table S8. Testing septile extreme group differences at age 7, 12 and 16 for EduYears GPS: Analysis of Variance**

|       | <i>N</i> | <i>lower extreme</i><br>Mean (SE) | <i>upper extreme</i><br>Mean (SE) | <i>F</i>                    | <i>d</i> |
|-------|----------|-----------------------------------|-----------------------------------|-----------------------------|----------|
| EA 7  | 1,139    | -0.26(0.04)                       | 0.25(0.04)                        | <b>72.84<sup>***</sup></b>  | 0.51     |
| EA 12 | 754      | -0.32(0.05)                       | 0.31(0.05)                        | <b>74.46<sup>***</sup></b>  | 0.63     |
| EA 16 | 1,127    | -0.47(0.04)                       | 0.43(0.04)                        | <b>284.88<sup>***</sup></b> | 0.90     |

Note. Lower and upper extreme represent lowest and highest GPS septiles; *d* = Cohen's *d*; \*\*\**P* < 0.001; unique 'best-fit' GPS was used for each respective trait.

**Table S9. Testing quintile extreme group differences at age 7, 12 and 16 for *EduYears* GPS: Analysis of Variance**

|       | <i>N</i> | <i>lower extreme</i><br>Mean (SE) | <i>upper extreme</i><br>Mean (SE) | <i>F</i>         | <i>d</i> |
|-------|----------|-----------------------------------|-----------------------------------|------------------|----------|
| EA 7  | 1,585    | -0.24(0.03)                       | 0.21(0.03)                        | <b>82.01***</b>  | 0.45     |
| EA 12 | 1,054    | -0.28(0.04)                       | 0.26(0.04)                        | <b>80.31***</b>  | 0.54     |
| EA 16 | 1,703    | -0.41(0.03)                       | 0.40(0.03)                        | <b>319.26***</b> | 0.81     |

Note. Lower and upper extreme represent lowest and highest GPS quintiles; *d* = Cohen's *d*; \*\*\**P* < 0.001; unique 'best-fit' GPS was used for each respective trait.

**Table S10. Testing for GPSxSES interaction at age 7, 12 and 16: Multiple Regression Analysis**

| <i>Dependent variable:</i>     |                                 |                                 |                                 |
|--------------------------------|---------------------------------|---------------------------------|---------------------------------|
|                                | EA 7                            | EA 12                           | EA 16                           |
| GPS                            | <b>0.09***</b><br>(0.05 - 0.12) | <b>0.13***</b><br>(0.09 - 0.17) | <b>0.19***</b><br>(0.16 - 0.22) |
| SES                            | <b>0.31***</b><br>(0.28 - 0.35) | <b>0.31***</b><br>(0.27 - 0.35) | <b>0.41***</b><br>(0.40 - 0.46) |
| GPS*SES                        | -0.01<br>(-0.04 - 0.02)         | 0.02<br>(-0.01 - 0.06)          | -0.02<br>(-0.05 - 0.01)         |
| <i>N</i>                       | 3,848                           | 2,341                           | 3,804                           |
| <i>R</i> <sup>2</sup>          | 0.12                            | 0.14                            | 0.25                            |
| Adjusted <i>R</i> <sup>2</sup> | 0.12                            | 0.14                            | 0.25                            |
| Residual Std. Error            | 0.94 (df = 3,844)               | 0.92 (df = 2,337)               | 0.86 (df = 3,800)               |
| <i>F</i> Statistic             | 168.85*** (df = 3; 3,844)       | 124.23*** (df = 3; 2,337)       | 415.80*** (df = 3; 3,800)       |

Note. Standardized coefficients are presented; 95% Confidence Intervals in brackets; \**P* < 0.05; \*\**P* < 0.01; \*\*\**P* < 0.001; unique 'best-fit' GPS was used for each respective trait.

**Table S11. Testing GPSxSES interaction for general cognitive ability: Multiple Regression Analysis**

*Dependent variable:*

|                                | g                                          |
|--------------------------------|--------------------------------------------|
| GPS                            | <b>0.11<sup>***</sup></b><br>(0.07 - 0.16) |
| SES                            | <b>0.37<sup>***</sup></b><br>(0.32 - 0.41) |
| GPS*SES                        | -0.03<br>(-0.07 - 0.01)                    |
| <i>N</i>                       | 1,956                                      |
| <i>R</i> <sup>2</sup>          | 0.15                                       |
| Adjusted <i>R</i> <sup>2</sup> | 0.15                                       |
| Residual Std. Error            | 0.92 (df = 1,952)                          |
| <i>F</i> Statistic             | 118.32 <sup>***</sup> (df = 3; 1,952)      |

Note. Standardized coefficients are presented; 95% Confidence Intervals in brackets; \**P* < 0.05; \*\**P* < 0.01; \*\*\**P* < 0.001; unique 'best-fit' GPS for *g* was used.

## Supplementary Figures

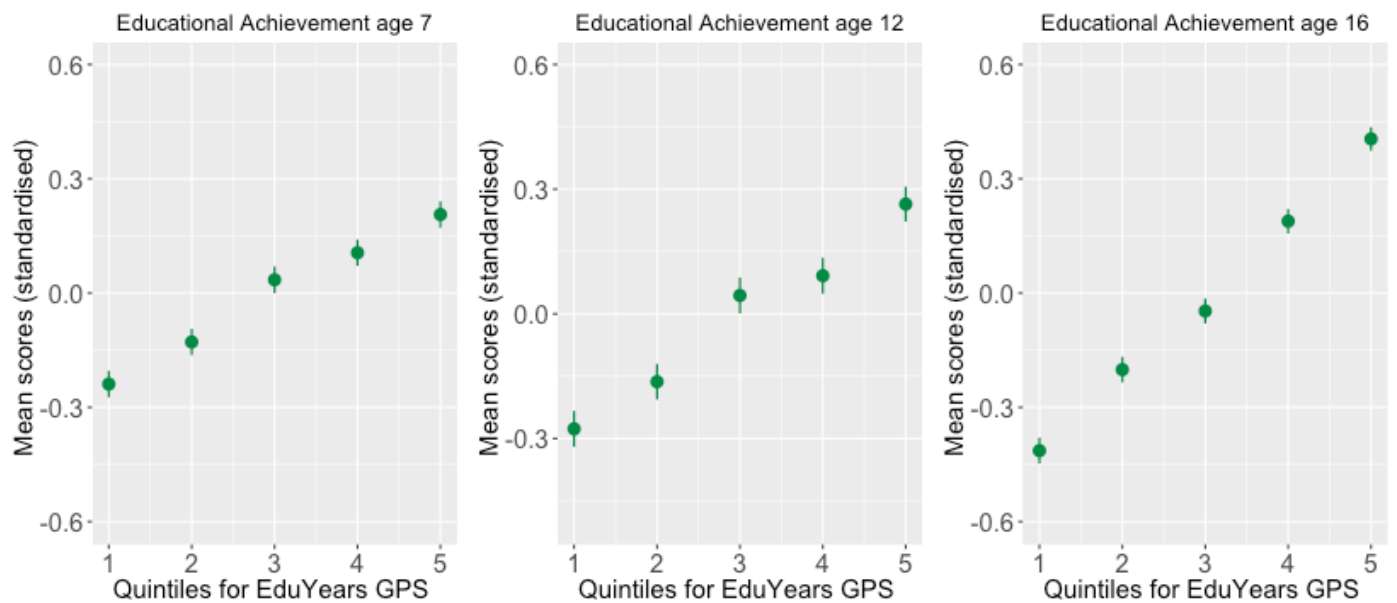

**Figure S1.** Standardized means and standard errors for educational achievement at age 7, 12 and 16 by genome-wide polygenic score (GPS) quintile. *EduYears* GPS were rescored as quintiles (1=lowest, 5=highest); unique 'best-fit' GPS was used for each respective trait.

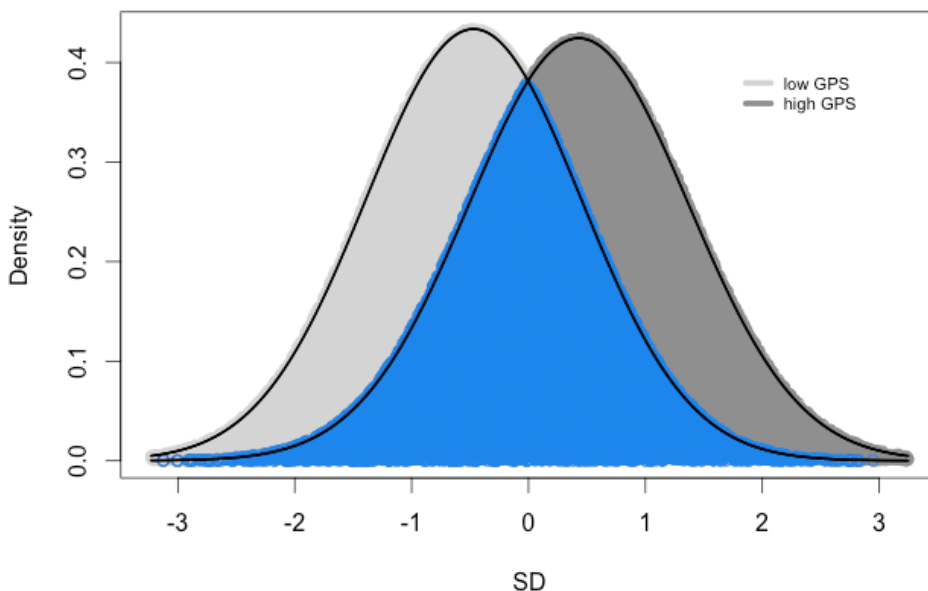

**Figure S2.** SD = standard deviation; Probability density functions of standardized educational achievement scores age 16 for the lowest *EduYears* GPS septile (low GPS) and highest *EduYears* GPS septile (high GPS). The area in blue indicates the overlap between the distributions.

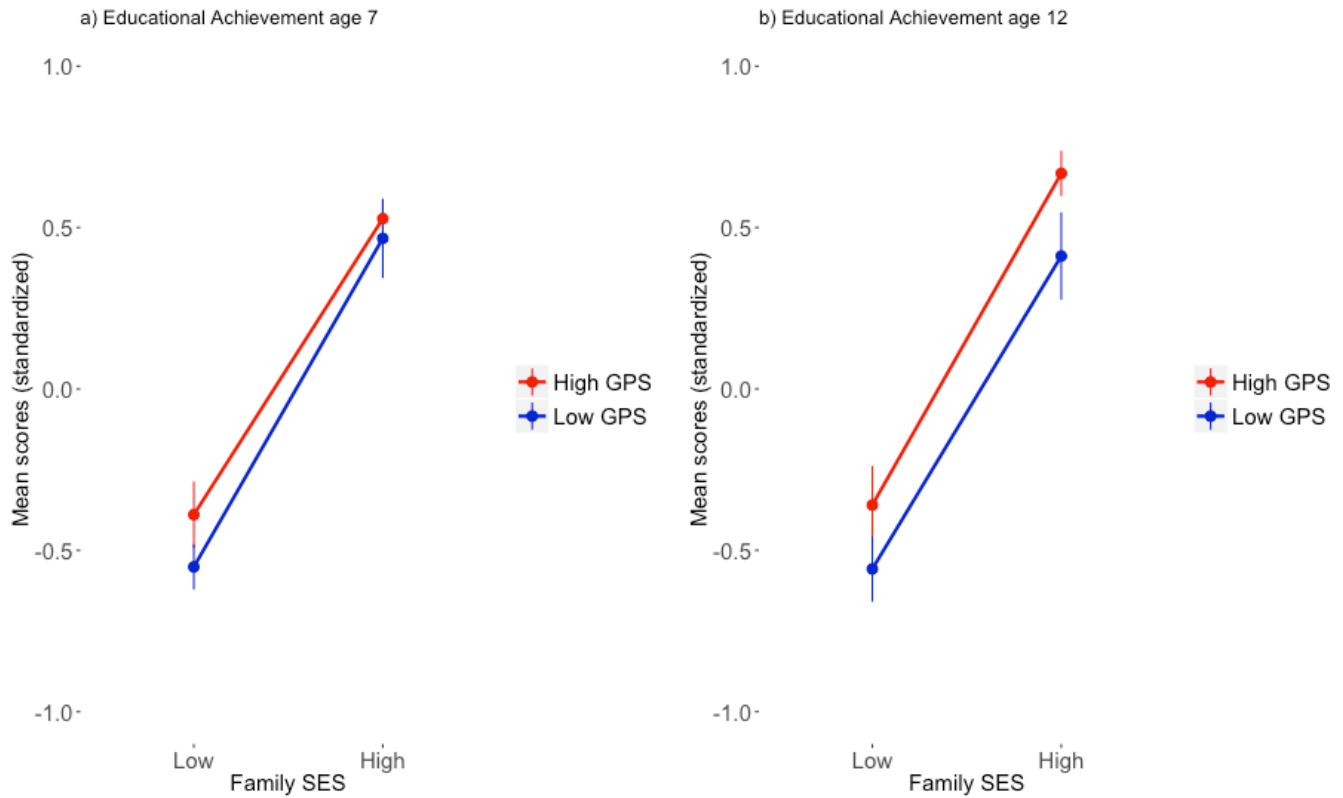

**Figure S3.** Testing for GxE interaction: Standardized educational achievement mean scores and error bars at a) age 7 and b) age 12 by *EduYears* GPS and family SES for individuals scoring in the highest and lowest quintiles of the distribution for both variables. No interaction effect was found at either age 7 ( $F(1,617) = 0.29, P = 0.59$ ) or age 12 ( $F(1,362) = 0.06, P = 0.80$ ); unique 'best-fit' GPS was used for both traits.

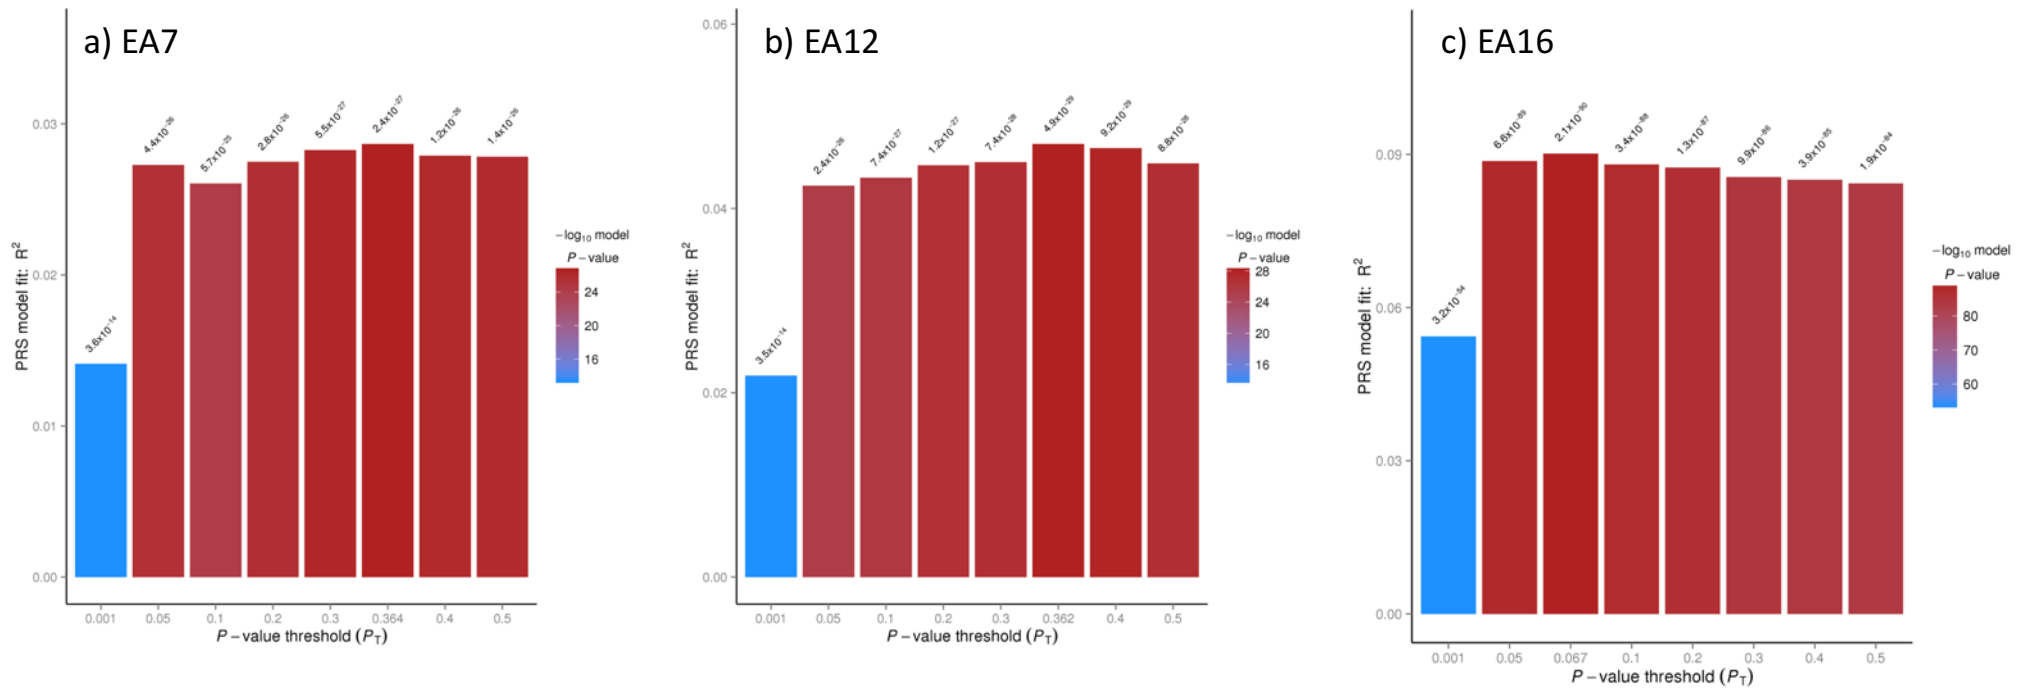

**Figure S4.** *EduYears* Genome-wide polygenic scores (GPS) explaining variance ( $R^2$ ) in educational achievement at a) age 7, b) age 12 and c) age 16. Different significance thresholds were used to include SNPs related to years of education ranging from 0.001 to 0.50. Using high-resolution scoring implemented in the PRSice software<sup>61</sup>, a series of regression analyses determined the most predictive threshold to compute a GPS for educational achievement at all ages. The uncorrected P-values adjacent to each bar represent the statistical significance of the association between *EduYears* GPS and the respective trait; see Supplementary Table S10 for the ‘best-fit’ GPS  $P$ -value threshold for educational achievement at age 7, 12 and 16.

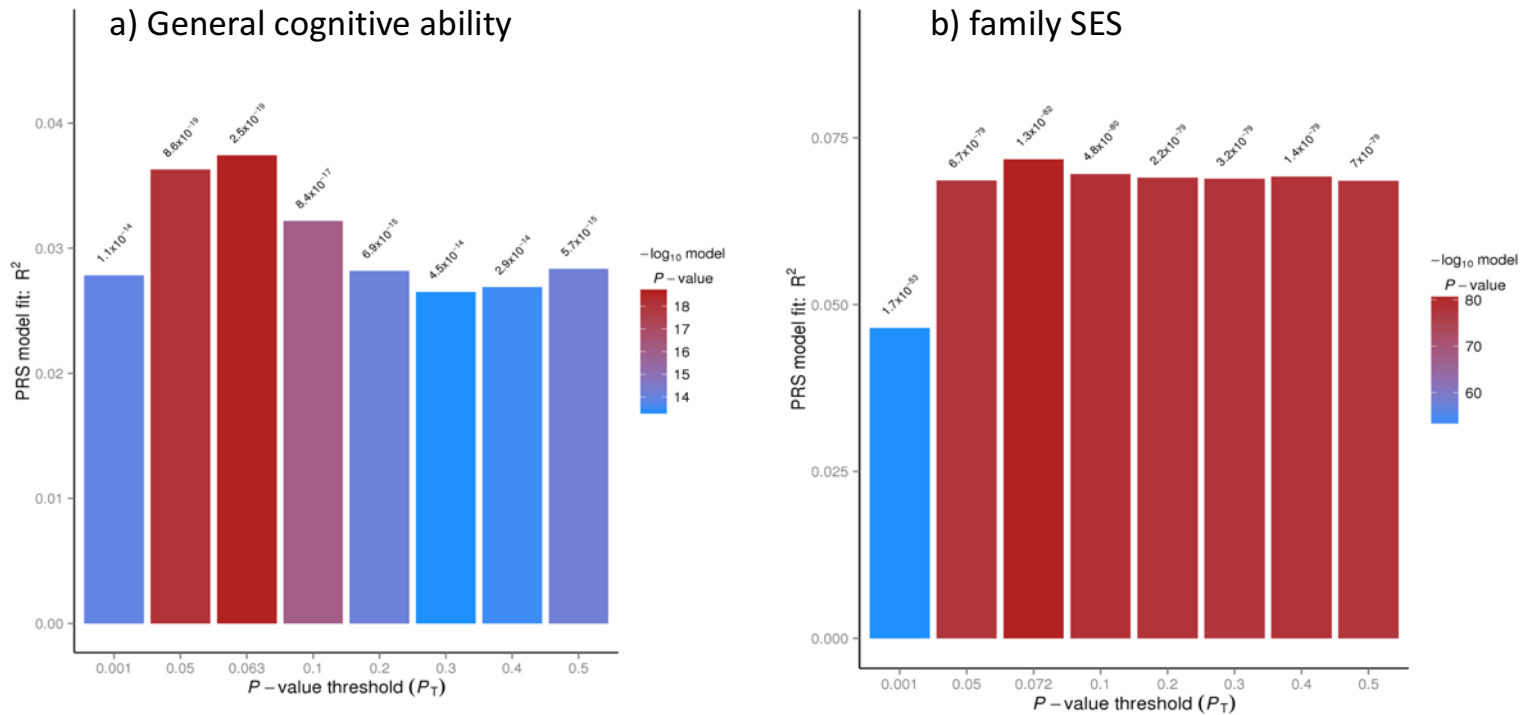

**Figure S5.** *EduYears* Genome-wide polygenic scores (GPS) explaining variance ( $R^2$ ) in a) general cognitive ability and b) family SES. Different significance thresholds were used to include SNPs related to years of education ranging from 0.001 to 0.50. Using high-resolution scoring implemented in the PRSice software<sup>61</sup>, a series of regression analyses determined the most predictive threshold to compute a GPS for educational achievement at all ages. The uncorrected P-values adjacent to each bar represent the statistical significance of the association between *EduYears* GPS and the respective trait; see Supplementary Table S10 for the ‘best-fit’ GPS  $P$ -value threshold for general cognitive ability and family SES.

## Supplementary Methods

**Methods S1.** According to the AVENGEME software<sup>62</sup>, a GPS constructed on the basis of a GWA discovery sample size of 328,918 in our target sample including 4,301 individuals (based on the sample size of the educational achievement measure at age 16) has more than 80% power to explain 0.2% of the phenotypic variance under the following circumstances; number of independent SNPs in the GPS = 50,000; proportion of total variance explained by genetic effects in discovery sample = 4%; covariance between genetic effect sizes in the discovery and target sample = 2%; proportion of SNPs with no effects on discovery trait = 99%; Range of P-values from GWA study summary statistics = 0 – 1.



## References

1. Rabbitt, P. M. A. *et al.* The University of Manchester Longitudinal Study of Cognition in Normal Healthy Old Age, 1983 through 2003. *Aging Neuropsychol. Cogn.* **11**, 245–279 (2004).
2. Harris, T. B. *et al.* Age, Gene/Environment Susceptibility-Reykjavik Study: multidisciplinary applied phenomics. *Am. J. Epidemiol.* **165**, 1076–1087 (2007).
3. Fraser, A. *et al.* Cohort Profile: the Avon Longitudinal Study of Parents and Children: ALSPAC mothers cohort. *Int. J. Epidemiol.* **42**, 97–110 (2013).
4. Schmidt, R. *et al.* Assessment of cerebrovascular risk profiles in healthy persons: definition of research goals and the Austrian Stroke Prevention Study (ASPS). *Neuroepidemiology* **13**, 308–313 (1994).
5. Schmidt, R., Fazekas, F., Kapeller, P., Schmidt, H. & Hartung, H. P. MRI white matter hyperintensities: three-year follow-up of the Austrian Stroke Prevention Study. *Neurology* **53**, 132–139 (1999).
6. Bertram, L. *et al.* Cohort profile: The Berlin Aging Study II (BASE-II). *Int. J. Epidemiol.* **43**, 703–712 (2014).
7. Firmann, M. *et al.* The CoLaus study: a population-based study to investigate the epidemiology and genetic determinants of cardiovascular risk factors and metabolic syndrome. *BMC Cardiovasc. Disord.* **8**, 1 (2008).
8. Bisgaard, H. The Copenhagen Prospective Study on Asthma in Childhood (COPSAC): design, rationale, and baseline data from a longitudinal birth cohort study. *Ann. Allergy Asthma Immunol. Off. Publ. Am. Coll. Allergy Asthma Immunol.* **93**, 381–389 (2004).
9. Rudan, I. *et al.* ‘10 001 Dalmatians:’ Croatia Launches Its National Biobank. *Croat. Med. J.* **50**, 4–6 (2009).
10. Styrkarsdottir, U. *et al.* Nonsense mutation in the LGR4 gene is associated with several human diseases and other traits. *Nature* **497**, 517–520 (2013).

11. Pfaffenrath, V. *et al.* Regional variations in the prevalence of migraine and tension-type headache applying the new IHS criteria: the German DMKG Headache Study. *Cephalalgia Int. J. Headache* **29**, 48–57 (2009).
12. Strachan, D. P. *et al.* Lifecourse influences on health among British adults: effects of region of residence in childhood and adulthood. *Int. J. Epidemiol.* **36**, 522–531 (2007).
13. Nelis, M. *et al.* Genetic Structure of Europeans: A View from the North–East. *PLOS ONE* **4**, e5472 (2009).
14. Sayed-Tabatabaei, F. A. *et al.* Heritability of the function and structure of the arterial wall: findings of the Erasmus Rucphen Family (ERF) study. *Stroke J. Cereb. Circ.* **36**, 2351–2356 (2005).
15. Sleegers, K. *et al.* Cerebrovascular risk factors do not contribute to genetic variance of cognitive function: the ERF study. *Neurobiol. Aging* **28**, 735–741 (2007).
16. Higgins, M. *et al.* NHLBI Family Heart Study: objectives and design. *Am. J. Epidemiol.* **143**, 1219–1228 (1996).
17. O'Donnell, C. J. *et al.* Genome-wide association study for coronary artery calcification with follow-up in myocardial infarction. *Circulation* **124**, 2855–2864 (2011).
18. Vartiainen, E. *et al.* Thirty-five-year trends in cardiovascular risk factors in Finland. *Int. J. Epidemiol.* **39**, 504–518 (2010).
19. Kaprio, J. The Finnish Twin Cohort Study: An Update. *Twin Res. Hum. Genet.* **16**, 157–162 (2013).
20. Paternoster, L. *et al.* Genome-Wide Population-Based Association Study of Extremely Overweight Young Adults – The GOYA Study. *PLOS ONE* **6**, e24303 (2011).
21. Tobin, M. D. *et al.* Common variants in genes underlying monogenic hypertension and hypotension and blood pressure in the general population. *Hypertension* **51**, 1658–1664 (2008).
22. Smith, B. H. *et al.* Cohort Profile: Generation Scotland: Scottish Family Health Study (GS:SFHS). The study, its participants and their potential for genetic research on health and illness. *Int. J. Epidemiol.* **42**, 689–700 (2013).

23. Aromaa, A. *Health and functional capacity in Finland : Baseline results of the Health 2000 health examination survey*. (National Public Health Institute = Kansanterveyslaitos, 2004).
24. Barker, D. J. P., Osmond, C., Forsén, T. J., Kajantie, E. & Eriksson, J. G. Trajectories of growth among children who have coronary events as adults. *N. Engl. J. Med.* **353**, 1802–1809 (2005).
25. McEvoy, M. *et al.* Cohort profile: The Hunter Community Study. *Int. J. Epidemiol.* **39**, 1452–1463 (2010).
26. Mahabadi, A. A. *et al.* The Heinz Nixdorf Recall study and its potential impact on the adoption of atherosclerosis imaging in European primary prevention guidelines. *Curr. Atheroscler. Rep.* **13**, 367–372 (2011).
27. Sonnega, A. *et al.* Cohort Profile: the Health and Retirement Study (HRS). *Int. J. Epidemiol.* **43**, 576–585 (2014).
28. Salvi, E. *et al.* Genomewide association study using a high-density single nucleotide polymorphism array and case-control design identifies a novel essential hypertension susceptibility locus in the promoter region of endothelial NO synthase. *Hypertension* **59**, 248–255 (2012).
29. Esko, T. *et al.* Genetic characterization of northeastern Italian population isolates in the context of broader European genetic diversity. *Eur. J. Hum. Genet. EJHG* **21**, 659–665 (2013).
30. Wichmann, H.-E., Gieger, C., Illig, T. & MONICA/KORA Study Group. KORA-gen--resource for population genetics, controls and a broad spectrum of disease phenotypes. *Gesundheitswesen Bundesverb. Ärzte Öffentl. Gesundheitsdienstes Ger.* **67 Suppl 1**, S26–30 (2005).
31. Deary, I. J., Whiteman, M. C., Starr, J. M., Whalley, L. J. & Fox, H. C. The impact of childhood intelligence on later life: following up the Scottish mental surveys of 1932 and 1947. *J. Pers. Soc. Psychol.* **86**, 130–147 (2004).
32. Deary, I. J. *et al.* The Lothian Birth Cohort 1936: a study to examine influences on cognitive ageing from age 11 to age 70 and beyond. *BMC Geriatr.* **7**, 28 (2007).
33. Stolck, R. P. *et al.* Universal risk factors for multifactorial diseases: LifeLines: a three-generation population-based study. *Eur. J. Epidemiol.* **23**, 67–74 (2008).

34. Miller, M. B. *et al.* The Minnesota Center for Twin and Family Research genome-wide association study. *Twin Res. Hum. Genet. Off. J. Int. Soc. Twin Stud.* **15**, 767–774 (2012).
35. Sanders, A. R. *et al.* No significant association of 14 candidate genes with schizophrenia in a large European ancestry sample: implications for psychiatric genetics. *Am. J. Psychiatry* **165**, 497–506 (2008).
36. Shi, J. *et al.* Common variants on chromosome 6p22.1 are associated with schizophrenia. *Nature* **460**, 753–757 (2009).
37. Magnus, P. *et al.* Cohort profile: the Norwegian Mother and Child Cohort Study (MoBa). *Int. J. Epidemiol.* **35**, 1146–1150 (2006).
38. Irgens, L. M. The Medical Birth Registry of Norway. Epidemiological research and surveillance throughout 30 years. *Acta Obstet. Gynecol. Scand.* **79**, 435–439 (2000).
39. Wetzels, J. F. M., Kiemeny, L. a. L. M., Swinkels, D. W., Willems, H. L. & den Heijer, M. Age- and gender-specific reference values of estimated GFR in Caucasians: the Nijmegen Biomedical Study. *Kidney Int.* **72**, 632–637 (2007).
40. Penninx, B. W. J. H. *et al.* The Netherlands Study of Depression and Anxiety (NESDA): rationale, objectives and methods. *Int. J. Methods Psychiatr. Res.* **17**, 121–140 (2008).
41. Sabatti, C. *et al.* Genome-wide association analysis of metabolic traits in a birth cohort from a founder population. *Nat. Genet.* **41**, 35–46 (2009).
42. Rantakallio, P. Groups at risk in low birth weight infants and perinatal mortality. *Acta Paediatr. Scand.* **193**, Suppl 193:1+ (1969).
43. Boomsma, D. I. *et al.* Netherlands Twin Register: from twins to twin families. *Twin Res. Hum. Genet. Off. J. Int. Soc. Twin Stud.* **9**, 849–857 (2006).
44. Pistis, G. *et al.* High Differentiation among Eight Villages in a Secluded Area of Sardinia Revealed by Genome-Wide High Density SNPs Analysis. *PLOS ONE* **4**, e4654 (2009).
45. McQuillan, R. *et al.* Runs of homozygosity in European populations. *Am. J. Hum. Genet.* **83**, 359–372 (2008).

46. Hillege, H. L. *et al.* Urinary albumin excretion predicts cardiovascular and noncardiovascular mortality in general population. *Circulation* **106**, 1777–1782 (2002).
47. Martin, N. W. *et al.* Educational Attainment: A Genome Wide Association Study in 9538 Australians. *PLOS ONE* **6**, e20128 (2011).
48. Hofman, A. *et al.* The Rotterdam Study: 2012 objectives and design update. *Eur. J. Epidemiol.* **26**, 657–686 (2011).
49. Estrada, K. *et al.* GRIMP: a web- and grid-based tool for high-speed analysis of large-scale genome-wide association using imputed data. *Bioinforma. Oxf. Engl.* **25**, 2750–2752 (2009).
50. Bennett, D. A. *et al.* Overview and findings from the rush Memory and Aging Project. *Curr. Alzheimer Res.* **9**, 646–663 (2012).
51. Bennett, D. A., Schneider, J. A., Arvanitakis, Z. & Wilson, R. S. Overview and findings from the religious orders study. *Curr. Alzheimer Res.* **9**, 628–645 (2012).
52. Pilia, G. *et al.* Heritability of Cardiovascular and Personality Traits in 6,148 Sardinians. *PLOS Genet* **2**, e132 (2006).
53. Völzke, H. *et al.* Cohort profile: the study of health in Pomerania. *Int. J. Epidemiol.* **40**, 294–307 (2011).
54. Magnusson, P. K. E. *et al.* The Swedish Twin Registry: establishment of a biobank and other recent developments. *Twin Res. Hum. Genet. Off. J. Int. Soc. Twin Stud.* **16**, 317–329 (2013).
55. Theodoraki, E. V. *et al.* Fibrinogen beta variants confer protection against coronary artery disease in a Greek case-control study. *BMC Med. Genet.* **11**, 28 (2010).
56. Moayyeri, A., Hammond, C. J., Valdes, A. M. & Spector, T. D. Cohort Profile: TwinsUK and Healthy Ageing Twin Study. *Int. J. Epidemiol.* **42**, 76–85 (2013).
57. Power, C. & Elliott, J. Cohort profile: 1958 British birth cohort (National Child Development Study). *Int. J. Epidemiol.* **35**, 34–41 (2006).
58. Raitakari, O. T. *et al.* Cohort profile: the cardiovascular risk in Young Finns Study. *Int. J. Epidemiol.* **37**, 1220–1226 (2008).

59. Sudlow, C. *et al.* UK Biobank: An Open Access Resource for Identifying the Causes of a Wide Range of Complex Diseases of Middle and Old Age. *PLOS Med* **12**, e1001779 (2015).
60. Okbay, A. *et al.* Genome-wide association study identifies 74 loci associated with educational attainment. *Nature* (in press).
61. Euesden, J., Lewis, C. M. & O'Reilly, P. F. PRSice: Polygenic Risk Score software. *Bioinformatics* **31**, 1466–1468 (2015).
62. Palla, L. & Dudbridge, F. A Fast Method that Uses Polygenic Scores to Estimate the Variance Explained by Genome-wide Marker Panels and the Proportion of Variants Affecting a Trait. *Am. J. Hum. Genet.* **97**, 250–259 (2015).
